# Supplementary material
Source: HighWire-hosted journal article supplement (http://www.ajnr.org/highwire/filestream/76246/field_highwire_adjunct_files/0/19-01157.pdf)
Supplement: 19-01157.pdf [file 19-01157.pdf]

**On-line Table: Recurrences**

| Summary of Recurrences                 |              |      |               |                 |                          |             |            |                                                     |
|----------------------------------------|--------------|------|---------------|-----------------|--------------------------|-------------|------------|-----------------------------------------------------|
| Clinically Occult Recurrences (n = 21) |              |      |               |                 |                          |             |            |                                                     |
|                                        | No. of Cases | Sex  | Mean Age (yr) | Smoking History | Subsite of Primary Tumor | T-Stage     | HPV Status | Treatment                                           |
| NI-RADS 2                              | 8            | 1 F  | 65.6          | 87.5% (7)       | Oral cavity (2)          | T1 (1)      | 2 (+)      | 4 Surgery (curative)                                |
|                                        |              | 7 M  |               |                 | Oropharynx (4)           | T2 (1)      | 6 (-)      | 3 Chemotherapy/radiation (palliative)               |
|                                        |              |      |               |                 | Hypopharynx (0)          | T3 (2)      |            | 1 Unknown                                           |
|                                        |              |      |               |                 | Larynx (2)               | T4a (3)     |            |                                                     |
|                                        |              |      |               |                 |                          | T4b (1)     |            |                                                     |
| NI-RADS 3                              | 13           | 3 F  | 65.8          | 69.2% (9)       | Oral cavity (4)          | T2 (1)      | 4 (+)      | 2 Surgery (curative)                                |
|                                        |              | 10 M |               |                 | Oropharynx (6)           | T3 (1)      | 9 (-)      | 7 Chemotherapy/radiation (1 curative, 6 palliative) |
|                                        |              |      |               |                 | Hypopharynx (1)          | T4 (4)      |            | 2 None                                              |
|                                        |              |      |               |                 | Larynx (2)               | T4a (5)     |            | 2 Unknown                                           |
|                                        |              |      |               |                 |                          | T4b (2)     |            |                                                     |
| Total                                  | 21           | 4 F  | 65.7          | 76.2% (16)      | Oral cavity (6)          | T1 (1)      | 6 (+)      | 6 Surgery                                           |
|                                        |              | 17 M |               |                 | Oropharynx (10)          | T2 (2)      | 15 (-)     | 10 Chemotherapy/radiation                           |
|                                        |              |      |               |                 | Hypopharynx (1)          | T3 (3)      |            | 2 None                                              |
|                                        |              |      |               |                 | Larynx (4)               | T4 (4)      |            | 3 Unknown                                           |
|                                        |              |      |               |                 |                          | T4a (8)     |            |                                                     |
|                                        |              |      |               |                 |                          | T4b (3)     |            |                                                     |
| Symptomatic Recurrences (n = 38)       |              |      |               |                 |                          |             |            |                                                     |
| NI-RADS 2                              | 15           | 4 F  | 62.9          | 66.7% (10)      | Oral cavity (6)          | T1 (2)      | 1 (+)      | 7 Surgery (curative)                                |
|                                        |              | 11 M |               |                 | Oropharynx (4)           | T2 (2)      |            | 5 Chemotherapy/radiation (1 curative, 4 palliative) |
|                                        |              |      |               |                 | Hypopharynx (2)          | T3 (5)      |            | 1 Chemotherapy alone (palliative)                   |
|                                        |              |      |               |                 | Larynx (3)               | T4a (3)     |            | 2 Unknown                                           |
|                                        |              |      |               |                 |                          | Unknown (3) |            |                                                     |
| NI-RADS 3                              | 23           | 6 F  | 64.2          | 73.9% (17)      | Oral cavity (10)         | T2 (7)      | 4 (+)      | 2 Surgery (curative)                                |
|                                        |              | 17 M |               |                 | Oropharynx (6)           | T3 (3)      | 1 (-)      | 5 Chemotherapy/radiation (palliative)               |
|                                        |              |      |               |                 | Hypopharynx (1)          | T4 (3)      |            | 9 Chemotherapy alone (palliative)                   |
|                                        |              |      |               |                 | Larynx (5)               | T4a (6)     |            | 2 Hospice care                                      |
|                                        |              |      |               |                 | Nasopharynx (1)          | T4b (2)     |            | 3 Declined further treatment                        |
|                                        |              |      |               |                 |                          | Unknown (2) |            | 1 Developed acute infection                         |
| Total                                  | 38           | 10 F | 63.8          | 76.2% (16)      | Oral cavity (16)         | T1 (2)      | 5 (+)      | 1 Unknown                                           |
|                                        |              | 28 M |               |                 | Oropharynx (10)          | T2 (9)      | 1 (-)      | 9 Surgery                                           |
|                                        |              |      |               |                 | Hypopharynx (3)          | T3 (8)      |            | 10 Chemotherapy/radiation                           |
|                                        |              |      |               |                 | Larynx (8)               | T4 (3)      |            | 10 Chemotherapy alone                               |
|                                        |              |      |               |                 | Nasopharynx (1)          | T4a (9)     |            | 2 Hospice care                                      |
|                                        |              |      |               |                 |                          | T4b (2)     |            | 3 Declined further treatment                        |
|                                        |              |      |               |                 |                          | Unknown (5) |            | 1 Developed acute infection                         |
|                                        |              |      |               |                 |                          |             |            | 3 Unknown                                           |
